# Supplementary material
Source: HighWire-hosted journal article supplement (https://gh.bmj.com/content/2/2/e000182)
Supplement: inline-supplementary-material-1 [file inline-supplementary-material-1.pdf]

**Supplementary Table S1:** Characteristics of subset of children in cognitive cohort examined in biomedical surveys at baseline (classes 4 and 5 in 38 schools)

|                                                                                            | <b>Control schools</b> | <b>Intervention schools</b> |
|--------------------------------------------------------------------------------------------|------------------------|-----------------------------|
| Number of schools surveyed                                                                 | 19                     | 19                          |
| Number of children surveyed                                                                | 284                    | 284                         |
| <b><i>School-level characteristics:</i></b>                                                | <b>Mean (SD)</b>       | <b>Mean (SD)</b>            |
| School size: mean no. of pupils                                                            | 205.1 (5.8)            | 185.4 (4.2)                 |
| Mean prevalence of malaria (range)                                                         | 78.4% (54.0 to 94.1)   | 80.2% (52.0 to 92.0)        |
| <b><i>Individual-level characteristics:</i></b>                                            | <b>Mean (SD)</b>       | <b>Mean (SD)</b>            |
| Mean age in years                                                                          | 10.1 (1.1)             | 10.4 (1.3)                  |
| Female (%)                                                                                 | 46.1% (131 / 284)      | 45.4% (129 / 284)           |
| Enrolled in class 5 (%)                                                                    | 21.1% ( 60 / 284)      | 26.4% ( 75 / 284)           |
| Nutritional status: Height-for-age z-score                                                 | -0.82 (1.20)           | -1.06 (1.49)                |
| Nutritional status: BMI-for-age z-score                                                    | -0.71 (0.81)           | -0.84 (0.82)                |
| Father is literate <sup>1</sup> (%)                                                        | 73.4% (207 / 282)      | 70.3% (199 / 283)           |
| Mother is literate <sup>1</sup> (%)                                                        | 32.3% ( 91 / 282)      | 23.2% ( 66 / 284)           |
| Household has a moped <sup>1</sup> (%)                                                     | 75.4% (199 / 264)      | 80.6% (224 / 278)           |
| Household has a telephone <sup>1</sup> (%)                                                 | 75.0% (198 / 264)      | 82.4% (230 / 279)           |
| Child slept under a net night before survey <sup>1</sup> (%)                               | 42.1% (111 / 264)      | 43.0% (120 / 279)           |
| <b><i>Study endpoints at baseline: Biomedical</i></b>                                      | <b>Mean (SD)</b>       | <b>Mean (SD)</b>            |
| Prevalence of anaemia: Hb <110 g/L (%)                                                     | 57.2% (159 / 278)      | 57.4% (160 / 279)           |
| Mean haemoglobin concentration, g/L                                                        | 111.1 (12.9)           | 112.6 (12.7)                |
| <i>Plasmodium</i> infection:                                                               |                        |                             |
| Prevalence of malaria parasites: all species (%)                                           | 78.7% (203 / 258)      | 79.1% (216 / 273)           |
| Parasite density per $\mu$ L blood, all species in slide-positive children: geometric mean | 654.4 (4.6)            | 449.2 (4.5)                 |
| Prevalence of gametocytes: all species (%)                                                 | 3.5% ( 9 / 258)        | 4.4% (12 / 273)             |
| <b><i>Study endpoints at baseline: Cognitive</i></b>                                       | <b>Mean (SD)</b>       | <b>Mean (SD)</b>            |
| Code transmission: single digit task, z-score                                              | 0.075 (1.05)           | -0.12 (0.94)                |
| Code transmission: double digit task, z-score                                              | 0.024 (0.85)           | -0.044 (1.06)               |
| Visual search task, z-score                                                                | -0.019 (0.92)          | 0.041 (1.03)                |
| Numeracy task, z score                                                                     | -0.013 (1.00)          | 0.099 (1.00)                |
| Vocabulary task, z-score                                                                   | 0.016 (1.05)           | -0.010 (0.96)               |
| Writing task, z-score                                                                      | 0.023 (0.92)           | -0.015 (1.06)               |

Data are mean (SD), or % (n/N), unless specified otherwise.

<sup>1</sup> Data based on child report

**Supplementary Table S2:** Effect of the intervention on biomedical and cognitive outcomes at 15 months follow-up: Results in subset of children in cognitive cohort with data on biomedical outcomes and household environment (classes 4 and 5 in 38 schools)

| Trial endpoints                                           | Summary Statistics |                      | Crude Change from Baseline |                      | Effect estimate:<br>Intervention vs Control schools<br>Odds ratio / Difference (95% CI); <i>p</i> -value |        |                                   |        |
|-----------------------------------------------------------|--------------------|----------------------|----------------------------|----------------------|----------------------------------------------------------------------------------------------------------|--------|-----------------------------------|--------|
|                                                           | Control schools    | Intervention schools | Control schools            | Intervention schools | Basic Model <sup>1</sup>                                                                                 |        | Fully Adjusted Model <sup>1</sup> |        |
| <b>Biomedical outcomes<sup>2</sup> in February 2012</b>   |                    |                      |                            |                      |                                                                                                          |        |                                   |        |
| Anaemia: Hb<110 g/L                                       | 38.6% (103 / 267)  | 36.7% (101 / 275)    | -18.6                      | -20.7                | 0.91<br>(0.51 to 1.60)                                                                                   | 0.733  | 0.77<br>(0.42 to 1.43)            | 0.413  |
| Mean Hb, g/L                                              | 119.4 (16.3)       | 120.7 (13.5)         | +8.3                       | +8.1                 | -0.08<br>(-2.79 to 2.63)                                                                                 | 0.955  | -0.40<br>(-3.26 to 2.46)          | 0.783  |
| <i>Plasmodium</i> infection:<br>Trophozoites, all species | 73.0% (200 / 274)  | 4.0% (11 / 276)      | -5.7                       | -75.1                | 0.012<br>(0.00 to 0.03)                                                                                  | <0.001 | 0.012<br>(0.004 to 0.033)         | <0.001 |
| Gametocytes, all species                                  | 4.4% ( 12 / 274)   | 0.4% ( 1 /276)       | +0.9                       | -4.0                 | 0.06<br>(0.01 to 0.58)                                                                                   | 0.015  | -                                 | -      |
| <b>Cognitive outcomes<sup>3</sup> in February 2012</b>    |                    |                      |                            |                      |                                                                                                          |        |                                   |        |
| <i>Code transmission:</i><br>Single digit task, z-score   | 1.43 (0.96)        | 1.32 (0.93)          | +1.36                      | +1.44                | 0.03<br>(-0.16 to 0.22)                                                                                  | 0.774  | 0.21<br>(0.00 to 0.41)            | 0.053  |
| Double digit task, z-score                                | 0.42 (0.97)        | 0.58 (1.01)          | +0.40                      | +0.62                | 0.22<br>(0.05 to 0.39)                                                                                   | 0.014  | 0.19<br>(-0.01 to 0.39)           | 0.057  |
| Visual search task <sup>4</sup> , z-score                 | 0.75 (1.03)        | 0.74 (1.00)          | +0.77                      | +0.70                | -0.06<br>(-0.39 to 0.31)                                                                                 | n/s    | 0.06<br>(-0.27 to 0.43)           | n/s    |
| Numeracy task <sup>4</sup> , z-score                      | 0.74 (0.93)        | 0.66 (0.93)          | +0.75                      | +0.56                | -0.11<br>(-0.32 to 0.12)                                                                                 | n/s    | -0.09<br>(-0.36 to 0.16)          | n/s    |
| Vocabulary task <sup>4</sup> , z-score                    | 0.66 (1.31)        | 0.73 (1.26)          | +0.64                      | +0.74                | 0.08<br>(-0.38 to 0.52)                                                                                  | n/s    | 0.06<br>(-0.43 to 0.59)           | n/s    |
| Writing task <sup>4</sup> , z-score                       | -0.23 (1.33)       | -0.38 (1.42)         | -0.25                      | -0.37                | -0.09<br>(-0.77 to 0.56)                                                                                 | n/s    | -0.19<br>(-0.87 to 0.50)          | n/s    |

Data are mean (SD), or % (n/N), unless specified otherwise.

<sup>1</sup> All statistical analyses account for clustering within schools and repeated measures within individuals over time.

<sup>2</sup> Fully adjusted analyses of biomedical outcomes control for age, sex, height for age z-score, ownership of household assets (proxy for socioeconomic status), and cluster-level prevalence of malaria parasitaemia at baseline (proxy for geographical differences risk of infection).

<sup>3</sup> All analyses of cognitive outcomes control for practice effects. Fully adjusted analyses control additionally for age, sex, school class, height for age z-score, parental literacy, ownership of household assets, and cluster- level prevalence of malaria parasitaemia at baseline.

<sup>4</sup> Analyses of these tasks additionally control for different versions of the tasks administered to classes 4 and 5. 95% CI are from bias-corrected bootstrap analyses using 2,000 bootstrap samples and n/s indicates that the results are not statistically significant at  $p=0.05$ .
